## Interleukin-12 elicits a non-canonical response in B16 melanoma cells to enhance survival

Christina N. Byrne-Hoffman<sup>1</sup>, Wentao Deng<sup>2,3</sup>, Owen McGrath<sup>4</sup>, Peng Wang<sup>1</sup>, Yon Rojanasakul<sup>1,3</sup>, David J Klinker II<sup>2,3,4</sup>

1. Department of Pharmaceutical Sciences, School of Pharmacy, West Virginia University, Morgantown, WV
2. Department of Microbiology, Immunology, and Cell Biology, School of Medicine, West Virginia University, Morgantown, WV
3. WVU Cancer Institute, School of Medicine, West Virginia University, Morgantown, WV
4. Department of Chemical and Biomedical Engineering, Benjamin M. Statler College of Engineering and Mineral Resources, West Virginia University, Morgantown, WV

**Running Title:** IL-12 engages non-canonical signaling in melanoma

### **Correspondence should be addressed to:**

David J. Klinker, II, PhD

Email: [david.klinker@mail.wvu.edu](mailto:david.klinker@mail.wvu.edu)

Office: 304-293-9346

Fax: 304-293-4139

Dept of Chemical and Biomedical Engineering

West Virginia University

PO Box 6102

Morgantown, WV 26506

TOTAL WORDS IN MAIN TEXT: 4,759

TOTAL FIGURES: 6

TOTAL TABLES: 1

## ABSTRACT

Within tissues, cells secrete protein signals that are subsequently interpreted by neighboring cells via intracellular signaling networks to coordinate a cellular response. However, the oncogenic process of mutation and selection can rewire these signaling networks to confer a fitness advantage to malignant cells. For instance, the melanoma cell model (B16F0) creates a cytokine sink for Interleukin-12 (IL-12) to deprive neighboring cells of this important extracellular signal for sustaining anti-tumor immunity. Alternatively, oncogenesis may also rewire intracellular signaling networks. To test this concept, we asked whether IL-12 provides an intrinsic advantage to B16F0 melanoma cells. Functionally, stimulation with IL-12 promoted the survival of B16F0 cells that were challenged with a cytotoxic agent but had no rescue effect on normal Melan-A melanocytes. We also explored a mechanistic basis for the functional results by surveying the phosphorylation intracellular proteins involved in canonical IL-12 signaling, STAT4, and cell survival, Akt. In contrast to T cells that exhibited a canonical response to IL-12 by phosphorylating STAT4, IL-12 stimulation of B16F0 cells phosphorylated both STAT4 and Akt. Collectively, the data suggests that B16F0 cells have shifted the intracellular response to IL-12 from engaging immune surveillance to favoring cell survival. In short, identifying how signaling networks are rewired can guide therapeutic strategies to restore effective immunosurveillance.

**KEY TERMS:** Cancer; signaling network; immune system; T cell; cytokine; JAK-STAT signaling.

## **INTRODUCTION**

Responses of the different cell types within tissues, such as T cells and Langerhans cells within the epidermal layer of skin, are coordinated by the extracellular release of protein signals. One such extracellular signal is the cytokine Interleukin-12 (IL-12)<sup>1</sup>. IL-12 is produced by antigen presenting cells, like Langerhans and Dendritic cells, to boost natural killer (NK) and cytotoxic T lymphocyte (CTL) activity and to polarize T helper cells towards a type 1 phenotype<sup>2</sup>. Activating NK, CTLs and type 1 T helper cells play important roles in controlling viral infections and defending against malignancy. Towards this aim, local delivery of IL-12 to the tumor microenvironment has been shown to promote tumor regression in both mouse models and human melanoma<sup>3-9</sup>.

Inside the cell, these extracellular signals are processed through a series of protein-protein interactions that transmit this information from the cell membrane to the nucleus to orchestrate a cellular response. In the case of IL-12, these extracellular signals are transduced by the canonical Janus-Kinase (JAK)-Signal Transducer and Activator of Transcription (STAT) signaling pathway<sup>10</sup>. The IL-12 receptor, composed of a  $\beta 1$  and  $\beta 2$  subunit, lacks intrinsic enzymatic activity and forms a complex with two JAKs, JAK2 and TYK2. Autophosphorylation of the receptor complex results in binding and activation of STAT4. Phosphorylated STAT4 dimerizes and then translocates to the nucleus to function as a transcription factor<sup>11</sup>. As a transcription factor, STAT4 promotes the expression and release of Interferon-gamma (IFN- $\gamma$ )<sup>12</sup>, which upregulates MHC class I antigen presentation<sup>13</sup>. An increase in antigen presentation enables CTLs to target and kill virally infected and malignant cells present within the tissue<sup>14</sup>.

While most of our understanding of how information is transmitted between cells is based on normal biology, cancer cells arise through a process of mutation and selection<sup>15,16</sup>. This implies that during oncogenesis cancer cells develop ways to block these extracellular signals or rewire intracellular signaling pathways to gain a fitness advantage<sup>17,18</sup>. Following from this premise, the mouse melanoma cell line B16F0 overexpresses one component of the

IL-12 receptor, IL12RB2, to form a cytokine sink for IL-12, which can deprive neighboring immune cells of this important antitumor cytokine<sup>19</sup>. As rewiring of intracellular cell signaling networks is another way that tumor cells can gain advantage, the objective of this study was to assess whether IL-12 provides an intrinsic advantage to B16F0 tumor cells. We hypothesized that overexpression of IL12RB2 in melanoma cells, such as the mouse model B16F0, has an intrinsic benefit for tumor cell survival. To test our hypothesis, we investigated the copy number of IL-12 receptor subunits, IL12RB1 and IL12RB2, on the surface of a mouse model of “normal” melanocytes and two melanoma models, B16F0 and Cloudman S91, and compared that to the expression of the receptor on the surface of an IL12-dependent mouse T helper cell model, 2D6. By observed the cytotoxic activity of small molecule inhibitor drug imatinib on melanoma cells, we found that IL-12 enhanced cell viability of B16F0 cells but not normal melanocytes in the presence of this cytotoxic agent. Finally, we explored a mechanistic basis for these functional assay results by surveying the activation intracellular proteins involved in canonical IL-12 signaling, STAT4, and cell survival, Akt.

## **RESULTS**

Inspired by our previous observation of an increase in IL12RB2 expression in the B16F0 cell line, we first asked whether the subunits of the IL-12 receptor are similarly upregulated in other melanoma cell lines that do not depend on IL-12 for their growth and proliferation. We compared two mouse melanoma cell lines, B16F0 and Cloudman S91, with Melan-A cells, a model of “normal” melanocytes. The 2D6 T cells, a mouse type 1 T helper cell line, were used as a positive control for IL-12 receptor expression<sup>19</sup>. IL12RB1 and IL12RB2 abundance was assayed by flow cytometry and calibrated to copy number using antibody calibration beads (Figure 1).

In 2D6 cells, IL12RB1 and IL12RB2 were present in almost a 2:1 copy ratio, with 43,000 copies of IL12RB1 and 19,500 copies of IL12RB2 and consistent with previous findings<sup>19</sup>. Interestingly, all three melanoma-related cell lines stained brightly for IL12RB2. The copy number of IL12RB2 was 1.5 times higher in the melanoma cell line versus the “normal” melanocyte line, where the Cloudman S91 and B16F0 cell lines expressed over 330,000 copies of IL12RB2 and Melan-A cells had 214,000 copies. In contrast, IL12RB1 abundance was barely detectable in all three cell lines, as staining was similar to the unstained controls. Only the B16F0 cell line was quantified at 1000 copies, while the Melan-A and Cloudman cell lines were below the detection level of 200 copies per cell. These data suggest that expression of components of the IL-12 receptor, IL12RB1 and IL12RB2, are differentially regulated in mouse cell models of melanoma compared with T cells. This differential regulation is manifested as a high copy number of IL12RB2 and an absence of IL12RB1, such that copies of the heterodimeric IL-12 receptor are limited.

While creating a cytokine sink by overexpressing IL12RB2 provides an indirect survival advantage to malignant melanocytes, we also wondered whether overexpression of IL12RB2 provides a direct survival advantage to malignant melanocytes. To test for an intrinsic survival advantage, we used an apoptosis and necrosis assay to assess cell viability during a

chemotherapy challenge with imatinib in the B16F0 melanoma (Figure 2) in combination with an IL-12 rescue. We used imatinib, as it is currently being investigated as a possible chemotherapy for metastatic melanoma<sup>20,21</sup>.

To determine whether IL-12 could “rescue” the melanoma cells from the cytotoxic effects of chemotherapy, we incubated the cells with three different concentration of IL-12 (40, 100, or 200 ng/mL) for 18 hours, which correspond to concentrations of IL-12 in the serum of various mouse models at approximately 3-134 ng/mL<sup>22</sup>. We then treated with three different concentrations of imatinib (5, 10, or 20  $\mu$ M) for 24 hours, with 0.1% DMSO in DPBS serving as a vehicle control. Cell viability was assayed by flow cytometry, whereby cells were identified based on forward and side scatter characteristics. Gating on “cells”, the presence of Annexin-V staining on the cell surface and no PI staining indicates a cell undergoing apoptosis, while cells that are positive for PI and negative for Annexin-V indicates a cell that underwent necrotic cell death<sup>22</sup>.

At baseline, the viability of B16F0 cells was greater than 90%. Upon treatment with imatinib, the viability was decreased in a dose-dependent manner, as expected. At 24 hours, very few of the cells were observed during the early stages of apoptosis (Annexin-V+, PI-) and the majority of non-viable cells either underwent necrotic cell death (Annexin-V-, PI+) or were in the late stages of apoptotic cell death (Annexin-V+, PI+). The addition of IL-12 reduced the cytotoxic efficacy of imatinib such that the maximum shift in viability of cells pre-treated with IL-12 before imatinib challenge was about 15%. To quantify the effects of imatinib and IL-12 on the viability of the B16F0 cells, we analyzed the data using a mathematical model and inferred the model parameters using a Markov Chain Monte Carlo (MCMC) approach. In theory, the model is identifiable as there are more data points (16) than model parameters (3). However given the non-linear nature of the model, the MCMC approach was used to assess whether the model parameters could be practically identified from the available data in addition to estimating parameter values. The MCMC results suggested that the effective concentration of imatinib

(EC50) and the rescue effect of IL-12 could be practically identified from the data as they exhibited symmetric bounded distributions. The posterior distributions provided a median value of the EC50 of imatinib equal to 40 nM for imatinib and of  $\alpha$  equal to 1 (Figure 2d). Moreover, the posterior distributions indicated that the rescue effect of IL-12 from the cytotoxic actions of imatinib was significant ( $p = 0.0095$  that  $\alpha < 0$ ). Quantitatively, a saturating concentration of IL-12 would increase the EC50 for imatinib by 100% (maximum likelihood value of  $\alpha = 1$ ), thereby shifting the imatinib dose-response curve to the right. We repeated this experiment using a plate-based viability assay (ATPlite) using both B16F0 and Melan-A cells (Figure 2e). While the variability was higher than the flow cytometry-based assay, IL-12 did not provide a rescue effect when Melan-A cells, an immortalized normal melanocyte cell line, were exposed to imatinib (i.e., maximum likelihood value of  $\alpha = 0$ ). While cell viability was assayed after only 24 hours, the observed difference observed with B16F0 cells implies that, over a 1 week period, tumor load would increase by about 10-fold in the IL-12 pre-treated cells versus chemotherapy alone.

To confirm the role of IL12RB2 in the “rescue” effect of IL-12 to cytotoxic stress with imatinib, we knocked down IL12RB2 in the B16F0 cell line using a CRISPR-Cas9 construct (Figure 3a). Generally, knockdown clones grew at similar rates, showed minor differences in color, and displayed similar phenotypes to the wild-type cell line. Knockdown of IL12RB2 was confirmed by flow cytometry. To compare the functional response, wild type (wt) and IL12RB2 knockdown (KD) B16F0 cells were treated with increasing concentrations of imatinib for 12 hours and pre-stimulation with 100 ng/mL IL-12 overnight was included as a second independent variable. Cell viability was assessed using an ATPlite assay. Consistent with data shown in Figure 2, imatinib dose-dependently reduced viability in the wild-type B16F0 cell line that was prevented with pre-treatment with IL-12 (Figure 3b). The rescue effect of IL-12 was most pronounced at the higher concentrations of imatinib. In comparison, imatinib also dose-dependently reduced viability of the IL12RB2 knockdown cells but IL-12 provided no benefit (Figure 3c). Visually, we also noticed that IL-12 had no effect on preventing cell detachment or

inhibiting growth in IL12RB2 KD cells. Collectively, the results suggested that IL-12 enhances the survival of B16F0 cells in the presence of cytotoxic stressors, like imatinib, and its effect is dependent on IL12RB2 expression.

Given the severe imbalance of IL-12 receptor expression in B16F0 cells, it was unclear what signals were transduced in B16F0 cells in response to IL-12 stimulation. Moreover, activating STAT4, which plays a role in Interferon- $\gamma$  gene expression and not survival, is thought to be the canonical signaling response to IL-12. To investigate, we assayed the phosphorylation of STAT4, a canonical signal transducer, and Akt, a non-canonical signal transducer involved in promoting cell survival and therapeutic resistance<sup>23</sup>, in response to IL-12 stimulation in both live B16F0 and 2D6 cells by flow cytometry (Figure 4). The 2D6 T helper cell line was used as a model for canonical IL-12 signal transduction. Following 12-24 hours of preconditioning in media free of IL-12 (2D6 only) and serum (2D6 and B16), we stimulated B16F0 and 2D6 cells with increasing concentrations of IL-12 (0, 40, 100, and 200 ng/mL; data shown for the 100 ng/mL treatment). Pre-conditioning ensured that activation of the IL-12 signaling pathway was due to IL-12, and not due to factors in the serum or basal IL-12. PBS was used as a negative vehicle control for both cell lines.

Both 2D6 and B16F0 cells phosphorylated STAT4 in response to IL-12 stimulation ( $p < 0.0001$  for 2D6 and  $p < 0.05$  for the B16), with the response more pronounced in 2D6 cells, as expected. Basal STAT4 phosphorylation was minimal in both cell lines for the vehicle only-treated controls. In terms of Akt phosphorylation, the B16 melanoma showed a marked activation of Akt within 3 hours at all concentrations of IL-12 tested, with a significant increase ( $p < 0.05$ ) in pAkt with 100 ng/mL IL-12 treatment. In contrast, 2D6 cells exhibited no significant shift in phosphorylation of Akt above baseline in response to IL-12 treatment. Pre-conditioning cells in the absence of serum was critical to observe differences in Akt phosphorylation.



To determine whether Akt activation in the B16 melanoma line was specific, we repeated the experiment and used a Western Blot assay to determine basal levels of Akt and test several inhibitors against the IL-12-induced effect on Akt phosphorylation (Figure 5). To serve as a negative control and to determine whether the PI3K pathway may be cross-activated in response to IL-12 stimulation, we used a PI3K inhibitor LY294002. In addition, we used a selective pAkt inhibitor, MK-2206, to investigate whether the observed effect was solely through possible direct activation of Akt by the IL-12 receptor. Two different phosphorylation sites on Akt were assessed, threonine 308 (Thr308) and serine 472/473 (Ser472/473). We also measured total Akt, and  $\beta$ -actin was used as a loading control. We found no change in phosphorylation of Thr308 in response to IL-12 stimulation, whereas baseline phosphorylation was turned off by both LY294002 and MK-2206. However, IL-12 stimulation produced a marked increase in phosphorylation of the Ser472/473 site, and again, phosphorylation was blocked by both the PI3K and Akt-selective inhibitors. Collectively, the results suggest that IL-12 provides a survival advantage to B16F0 cells and that IL-12 induced a different cellular response in B16F0 cells compared to 2D6 T cells, whereby phosphorylation of Akt, a non-canonical signal transducer that is associated with enhanced cell survival is favored over STAT4, which is the canonical signal transducer.

To extend our focus beyond mouse cell models, we also wondered whether similar patterns of gene expression are observed in human melanoma. Towards this aim, we determined whether IL12RB1 and IL12RB2 gene levels are significantly different in human melanoma and are comparable to our protein level findings in mouse models of melanoma (Table 1). From data retrieved from Oncomine, we found that IL12RB2 is significantly upregulated by approximately 5 fold in human melanoma, compared to normal tissue and at a higher level than IL12RB1, which was also elevated by approximately 2.26 fold, compared to normal. Benign nevus samples did not produce significant differences in IL12RB1 or IL12RB2

gene levels. While normal tissue samples were not included in the Cancer Genome Atlas (TCGA) study, there was no significant difference in the levels of IL12RB2 between the primary or metastatic sites. However, IL12RB1 was significantly upregulated by more than 1.5 times in metastatic versus primary tumors. These results state that significant gene level changes in the IL-12 receptor subunits occur within development of human melanoma and are exacerbated in metastatic sites versus primary tumors. Because the TCGA and Oncomine data sets reflect homogenized tissue samples that may contain a mixture of tumor and immune cells, we also examined data sets from the Cancer Cell Line Encyclopedia (CCLE), which reflects mRNA expression in cellular models of human cancer. In the reported melanoma cell lines, expression of IL12RB2 was significantly greater than IL12RB1, such that the ratio of IL12RB2 to IL12RB1 gene expression was 1.06 ( $p < 0.028$ , ratio  $< 1$ ) (Table 1).

## **DISCUSSION**

Given the importance of IL-12 in promoting type 1 anti-tumor immune response, we had previously observed that, by overexpression one component of the IL-12 receptor IL12RB2, B16 melanoma cells could create a “cytokine sink” and deprive tumor-infiltrating lymphocytes of this local signal to sustain an anti-tumor response<sup>19</sup>. Here, our results indicate that IL-12 can act directly on B16 melanoma cells to phosphorylate STAT4 (Figure 4a and 4c), although less pronounced as observed in T helper cells (Figure 4b and 4d). In contrast to T helper cells, IL-12 provided an intrinsic survival advantage to B16 melanoma cells by engaging the non-canonical signal transducer Akt, that is B16 cells re-wired the canonical immune cell response to IL-12 to enhance cell survival. The survival benefit of IL-12 appears to be mediated through IL12RB2, as knock down of IL12RB2 abrogated the effect. As the IL-12 rescue was not observed with Melan-A cells, this observation indicates that melanoma cells may rewire signal transduction to create a non-canonical signaling pathway to promote survival in response to cytokines within the tumor environment.

As summarized in Figure 6, we propose a mechanism by which rewiring of the canonical IL-12 pathway could occur that is initiated by IL-12 mediated homodimerization of IL12RB2. IL-12 has been shown to promote a low but significant level of homodimerization of IL12RB2 subunits<sup>24</sup>. Overexpression of IL12RB2 may make this association more likely to occur in the melanoma cell line. Following IL12RB2 homodimerization, the receptor associated Janus kinase, JAK2, interacts to promote cross phosphorylation and activation<sup>38</sup>. Activated JAK2 can then recruit and activate PI3K via the p85a subunit<sup>25,26</sup>. Activated PI3K can then activate Thr308-primed Akt via phosphorylating the Ser 472/473 loci. Our findings support the direct role of PI3K in the observed phosphorylation of Akt to affect cell survival, as inhibitors directed against PI3K pathway like LY294002 ameliorated this effect.

Rewiring of signaling pathways during oncogenesis is emerging as an important concept in cancer biology<sup>27</sup>. For instance, a recent systems biology study across all known human kinases showed there are six types of network-attacking mutations that perturb signaling networks to promote cancer, including mutations that dysregulate phosphorylation sites to cause constitutive activation or deactivation, rewire networks through upstream or downstream interactions, and dysregulate network dynamics by activating or deactivating nodes of response<sup>28</sup>. As for precedence of non-canonical signaling within the JAK-STAT pathway, STAT3 has been reported as a non-canonical activator of the NF- $\kappa$ B pathway to promote myeloid-derived suppressor cells in the tumor microenvironment<sup>29</sup>. Beside oncogenic fusion proteins, increased abundance of intracellular signaling proteins through either copy number amplifications or epigenetic changes can also create non-canonical protein interactions that could redirect the flow of intracellular information<sup>30</sup>. Knowing the basis for cancer cell rewiring can be used for therapeutic advantage. For instance, the non-canonical use of signaling cross-talk downstream of the EGF receptor sensitized resistant triple negative breast cancers to DNA-damaging chemotherapies by inhibition of EGFR<sup>31</sup>. Similar approaches could be applied to circumvent rewiring of the IL-12 pathway.

While additional studies may help clarify the mechanistic details and generalize the finding, several prior studies lend support that IL-12 can elicit a direct response in tumor cells and that the IL-12 receptor can activate non-canonical signaling elements. In vitro, IL-12 had a direct effect to upregulate MHC complexes on human melanoma cell lines<sup>32</sup>. A similar response was not observed in mouse tumor cell lines although the concentrations of IL-12 used were rather low (0.3 – 1 ng/ml)<sup>33</sup>. Su et al. also reported that the expression of IL12RB1 was absent in B16 cells compared to other mouse tumor cell lines. However, results for IL12RB2 are inconclusive as IL12RB2 amplicons were unable to be observed in any of the tumor cell lines. IL-12 did activate NF- $\kappa$ B in two cell lines (MC-38 and Colon-26-NL-17); yet, this could be an

artifact of the platform used for producing recombinant IL-12, such as endotoxin derived from *E coli*<sup>34</sup>. Using the B16 model in IL12RB2 KO mice, Airoidi et al. show that IL-12 directly acts on B16 tumor cells such that, after 12 days, tumor growth is reduced by a factor of 2.5<sup>35</sup>. This difference in tumor growth was attributed to a release of anti-angiogenic factors by B16 cells following IL-12 stimulation; yet, a specific mechanism for this observation remains unclear. While this may seem at odds with our observations, this in vivo study doesn't rule out the possibility that IL-12 may have a pleiotropic effect on tumor cells such that it may both promote survival in the presence of cytotoxic stressors and inhibit angiogenesis. Of note, cellular stress, such as hypoxia, is an important trigger for angiogenesis<sup>36</sup>. In terms of signal transducers, Goreilik et al. observed the activation of both Akt and STATs upon treating human ovarian cancer cell lines with 40 ng/ml of IL-12<sup>37</sup>. Alternatively another cytokine receptor type could associate with IL12RB2, which contains binding sites for JAK2 and STAT4 and primarily interacts with the IL12p35 subunit of IL-12. For instance, IL-35 signals through a receptor comprised of the IL12RB2 and the gp130 subunits, but does not bind nor transduce signals in response to IL-12, which binds cytokines IL-6, IL-11, and several other cytokines to activate STATs<sup>24</sup>.

In summary, IL-12 provides an important function in coordinating an anti-tumor immune response. In melanoma, overexpression of one component of the IL-12 receptor, IL12RB2, by malignant melanocytes may not only serve to deprive immune cells of this important cytokine, but malignant melanocytes may also use IL-12 as a means of activating cell survival pathways. Supported by prior studies, we present evidence showing that IL-12 increased the dose of imatinib chemotherapy needed to induce cell death in B16 melanoma cells and that IL-12 activated a non-canonical cell survival protein, Akt, in a melanoma cell line, but not in the 2D6 T helper cell line. While subsequent studies will help clarify the mechanistic details to improve the translational impact, these studies highlight the importance of non-canonical pathway activation in cancer.

## **METHODS**

### **Cell Culture**

B16F0 mouse melanoma (ATCC, Manassas, VA), Cloudman S91 mouse melanoma (ATCC), Melan A mouse melanocytes (V. Hearing, National Cancer Institute, Bethesda, MD) and 2D6 cells (M. Grusby, Harvard University, Cambridge, MA) were cultured at 37.5°C with 5% CO<sub>2</sub>. Complete medium for B16F0 cells consisted of Dulbecco's Modified Eagle Medium (DMEM, Corning, Manassas, VA, USA) supplemented with 10% heat-inactivated fetal bovine serum (FBS-HI, Hyclone, Logan UT, USA), 1% penicillin-streptomycin (Pen-Strep, Hyclone), and L-Glutamine (2 mM final concentration, Mediatech Inc., Herndon, VA, USA). Cloudman S91 complete culture medium was DMEM with 10% FBS-HI and 1% Pen-Strep. Melan A culture medium was DMEM with 10% FBS, 20 mM HCl, 10mM HEPES, 1% Pen-Strep, and fresh 12-O-tetradecanoyl phorbol-13-acetate (TPA; 200 nM) and phenylthiourea (PTU; 200µM). Cells were detached using either Trypsin-Versene or magnesium and calcium-free Dulbecco's Phosphate-Buffered Saline (DPBS, Corning). 2D6 cells were maintained in RPMI 1640 supplemented with 10% FBS-HI, 1% Pen-Strep, 2 mM L-Glutamine, 50 mM HEPES, 49 mM b-mercaptoethanol (Sigma Chemical, St Louis, MO), 100 mM sodium pyruvate (Fisher Scientific, Pittsburgh, PA, USA), 1% MEM non-essential amino-acid solution (100x Fisher Scientific) and 6.7 ng/ml recombinant mouse IL12p70 (IL-12, eBioscience, San Diego, CA, USA).

### **Apoptosis and Necrosis Assay**

Cells were plated at a density of  $1 \times 10^5$  cells/well in a 12 well tissue culture plate (BD Falcon, BD Biosciences, San Jose, CA). Cells were allowed to adhere to the plate for 12 hours prior to the beginning of the experiment, then pre-treated with complete culture media with a final concentration of 40, 100, or 200 ng/mL IL-12. After 18 hours of pretreatment, cells were treated with 0, 5, 10, or 20 µM Imatinib (Cayman Chemical, Ann Arbor Michigan). A 0.1% DMSO vehicle control in complete media was used as a negative control, while cells heated to

50°C for 5-10 minutes served as a positive control cell death. After 24 hours of incubation with imatinib or other treatment, cell viability was assessed using either a flow cytometry-based assay or an ATPlite assay (PerkinElmer, Shelton, CT), which was performed according to the manufacturer's instructions. For the flow cytometry-based assay, cell media and floating cells were pooled with cells detached with DPBS without magnesium or calcium, centrifuged in 15 mL conical tubes at approximately 250xg, supernatant removed, and cells transferred to a 96 well round bottom plate (BD Falcon) for staining. Cells were then washed with DPBS with magnesium and calcium. After centrifuging at approximately 250xg again and removing the supernatant, cells were then stained with an apoptosis and necrosis staining kit (ABD Serotech, Bio-Rad, Raleigh, NC) according to manufacturer's instructions. Samples were then analyzed shortly thereafter by flow cytometry on a BD LSRFortessa. Data was analyzed in the BD FACSDiva 3.0 software and in Microsoft Excel. For the ATPlite assay, pre-treated cells were lysed with 50µL/well of mammalian cell lysis solution, followed by 5 min. shaking. The substrate solution was added (50µL/well), shaken for another 5 min., and incubated 10 min. at room temperature protected from light. Finally, the luminescence was measured using a Modulus Microplate Multimode Reader (Turner BioSystems). B16F0 cells cultured in base media alone and exposed to 10% DMSO were included as controls. Statistical significance in the difference in viability upon IL-12 treatment for a given imatinib concentration was assessed using a two-tailed homoscedastic t-Test, where a p-value less than 0.05 was considered significant.

### **Flow Cytometry**

Cells were grown at a density of  $1 \times 10^5$  cells/well in a 12-well tissue culture plate if adherent (B16F0, Melan-A, Cloudman S91) or in a 96 well round bottom plate if non-adherent (2D6) (BD Falcon). At each time point, adherent cells were detached from the plate with Trypsin-EDTA or DPBS without calcium/magnesium. For IL12RB1 and IL12RB2 copy number, cells were stained for 30 minutes with Yellow or Violet Live/Dead Fixable Stain (BD Biosciences), fixed with Lyse/Fix Buffer (BD Biosciences), then surface stained for PE-IL12RB1

(BD Biosciences) and AlexaFluor 488-IL12RB2 (R&D Systems, Minneapolis, MN) antibodies separately. Counting beads were also stained with IL12RB1 or IL12RB2 antibody within the same experiment and used to assess receptor copy number. Fluorescent spillover was assessed using single stain controls for IL12RB1 and IL12RB2 antibodies and Live/Dead stains. To assay intracellular activity of STAT4 and Akt, B16F0 and 2D6 cells were starved of FBS and IL-12p70 for 12-24 hours after plating and then treated for 1hr or 3hr with 100 ng/mL IL-12p70 or vehicle. Positive control cells were treated with 10% FBS and 40 ng/mL IL-12p70. Cells were then stained using Violet Fixable Live/Dead (Invitrogen) to assess cell viability, and then fixed (BD Biosciences Lyse/Fix), permeabilized with Perm Buffer III (BD Biosciences), blocked with Mouse IgG (1:100, concentration, Jackson Labs, West Grove, PA), and intracellular stained with AF647-pAKT and AF488-pSTAT4 (BD Biosciences). Cells were stored at 4°C in PBSaz before analyzing via flow cytometry. Cells were analyzed using the BD LSRFortessa flow cytometry analyzer, FCSExpress, and BD FACSDiva 3.0 software. Following acquiring 20,000 events on average, forward and side scatter were used to gate cell populations. Live-Dead staining was used as a gate for live cells.

### **CRISPR/Cas9 Constructs, Transfection and Cloning Validation**

Two vectors were prepared by GenScript (Piscataway, NJ) with puromycin resistance genes and the flanking guide RNA (gRNA) sequences TCCGCATACGTTACGTTCT and AGAATTTCCAAGATCGTTGA and transfected into wild-type B16F0 cells using Lipofectamine 2000 (Thermo Fisher Scientific, Waltham, MA). Transfection was confirmed via microscopy visually using a green fluorescent protein control. Derivatives of the B16F0 cell line were obtained from single clones isolated using puromycin selection and single cell plating. Approximately 10-25% of clones were estimated at having some level of IL12RB2 knockout, which was confirmed by flow cytometry with PE-IL12RB12 (R&D Systems).

### **Western Blot**



B16 and 2D6 cells were grown in complete media at a density of  $5 \times 10^5$  cells/well in 6 well plates 24 hours before the beginning of the experiment. At 12 hours prior, cells were starved of FBS and IL-12. One hour before start of experiment, cells were treated with control solution, PI3K inhibitor LY294002 (50  $\mu$ M, Cell Signaling Technology, Danvers, MA), or with Akt inhibitor MK-2206 (2.4  $\mu$ g/mL or 5  $\mu$ Mol/L, Cayman Chemical, Ann Arbor, MI). Cells were then treated with 100 ng/mL IL-12 at  $t=0$  or stimulated with FBS as a positive control. After 30 minutes or 3 hours, cells were collected for cell lysates for western blot analysis for total Akt (1:1000, Cell Signaling Technology), pAkt (1:1000, Cell Signaling Technology), and  $\beta$ -actin (1:1000, Sigma Aldrich, St. Louis, MO). The cells were lysed in radioimmunoprecipitation assay (RIPA) buffer (50 mM Tris-HCl, pH 8.0, 150 mM NaCl, 1% Nonidet P-40, 0.5% sodium deoxycholate, 0.1% SDS, 2 mM EDTA, 1 mM  $\text{NaVO}_4$ , 10 mM NaF, and protease inhibitors), and the protein concentration in the lysates was determined by a spectrophotometer. Equal amounts of the lysates were subjected to SDS-polyacrylamide gel electrophoresis (PAGE) and the immunoblotting was performed with use of the primary antibodies listed above and secondary antibodies conjugated to horseradish peroxidase (Jackson ImmunoResearch, West Grove, PA). Proteins were visualized by chemiluminescence.

### Data Analysis and Statistics

The impact of IL-12 on decreasing the cytotoxic efficacy of imatinib was inferred from the data using a mathematical model:

$$\text{Live Cells \%} = 100 \cdot \left( 1 - \frac{C_{Im}}{C_{Im} + EC_{50} \cdot \left[ 1 + \alpha \frac{C_{IL12}}{C_{IL12} + K_d} \right]} \right)$$

where  $C_{Im}$  is the concentration of imatinib,  $C_{IL12}$  is the concentration of IL-12,  $EC_{50}$  is the effective concentration required to elicit a 50% drop in viability,  $K_d$  is the equilibrium binding constant of IL-12 and set equal to 40 ng/mL, and  $\alpha$  is a parameter that quantifies the impact of IL-12 in shifting the  $EC_{50}$  of imatinib. As described previously<sup>19</sup>, a Markov Chain Monte Carlo

approach based on a Metropolis-Hasting algorithm was used to obtain converged Markov Chains that represent samples from the distributions in the model parameters that were consistent with the data, that is posterior distributions in the model parameters. The posterior distribution in parameter  $\alpha$  was used to infer whether the effect was greater than zero and significant. A p-value ( $P(\alpha < 0 | M, Y)$ ) of less 0.05 was considered as significant, that is the data support that IL-12 provides a rescue effect to imatinib. The significance associated with differences in STAT4 and Akt phosphorylation was assessed using a two-tailed homoscedastic t-Test in GraphPad Prism 7, where a difference with a p-value of less than 0.05 was considered significant and not explained by random noise.

## **Acknowledgements**

The authors would like to acknowledge Cassidy Bland and Adam Palmer for their assistance in manuscript preparation and Vanessa Cuppett for technical assistance. Sources of funding that contributed to this work include NIH/NCI R01CA193473, NSF 1644932, WVU Flow Cytometry Core funding: MBRCC CoBRE grant GM103488/RR032138, ARIA S10 grant RR020866, Fortessa S10 grant OD016165, and WV InBRE grant GM103434.

## **Author contributions**

C.B. and D.K. wrote the manuscript. O.M., W.D., P.W., and Y.R. contributed to the methods and assisted with preparation of figures. All authors reviewed the manuscript.

## **Competing financial interests**

Christina N. Byrne-Hoffman, Wentao Deng, Owen McGrath, Peng Wang, Yon Rojanasakul, and David J. Klink declare that they have no conflict of interest or competing financial interests.

## REFERENCES

- 1 Colombo, M. P. & Trinchieri, G. Interleukin-12 in anti-tumor immunity and immunotherapy. *Cytokine Growth Factor Rev* **13**, 155-168 (2002).
- 2 Athie-Morales, V., Smits, H. H., Cantrell, D. A. & Hilkens, C. M. Sustained IL-12 signaling is required for Th1 development. *J Immunol* **172**, 61-69 (2004).
- 3 Chinnasamy, D. *et al.* Local delivery of interleukin-12 using T cells targeting VEGF receptor-2 eradicates multiple vascularized tumors in mice. *Clin Cancer Res* **18**, 1672-1683, doi:10.1158/1078-0432.CCR-11-3050 (2012).
- 4 Choi, I. K. *et al.* Oncolytic adenovirus co-expressing IL-12 and IL-18 improves tumor-specific immunity via differentiation of T cells expressing IL-12Rbeta2 or IL-18Ralpha. *Gene Ther* **18**, 898-909, doi:10.1038/gt.2011.37 (2011).
- 5 Koneru, M., O'Cearbhaill, R., Pendharkar, S., Spriggs, D. R. & Brentjens, R. J. A phase I clinical trial of adoptive T cell therapy using IL-12 secreting MUC-16(ecto) directed chimeric antigen receptors for recurrent ovarian cancer. *J Transl Med* **13**, 102, doi:10.1186/s12967-015-0460-x (2015).
- 6 Seo, S. H. *et al.* The effects of mesenchymal stem cells injected via different routes on modified IL-12-mediated antitumor activity. *Gene Ther* **18**, 488-495, doi:10.1038/gt.2010.170 (2011).
- 7 Tatsumi, T. *et al.* Intratumoral delivery of dendritic cells engineered to secrete both interleukin (IL)-12 and IL-18 effectively treats local and distant disease in association with broadly reactive Tc1-type immunity. *Cancer Res* **63**, 6378-6386 (2003).
- 8 Zhang, L. *et al.* Tumor-infiltrating lymphocytes genetically engineered with an inducible gene encoding interleukin-12 for the immunotherapy of metastatic melanoma. *Clin Cancer Res* **21**, 2278-2288, doi:10.1158/1078-0432.CCR-14-2085 (2015).
- 9 Zhao, X. *et al.* Intratumoral IL-12 gene therapy results in the crosspriming of Tc1 cells reactive against tumor-associated stromal antigens. *Mol Ther* **19**, 805-814, doi:10.1038/mt.2010.295 (2011).
- 10 Murray, P. J. The JAK-STAT signaling pathway: input and output integration. *J Immunol* **178**, 2623-2629 (2007).
- 11 Watford, W. T. *et al.* Signaling by IL-12 and IL-23 and the immunoregulatory roles of STAT4. *Immunol Rev* **202**, 139-156, doi:10.1111/j.0105-2896.2004.00211.x (2004).
- 12 Yamamoto, K. *et al.* Stat4, a novel gamma interferon activation site-binding protein expressed in early myeloid differentiation. *Mol Cell Biol* **14**, 4342-4349 (1994).
- 13 Gaczynska, M., Rock, K. L. & Goldberg, A. L. Gamma-interferon and expression of MHC genes regulate peptide hydrolysis by proteasomes. *Nature* **365**, 264-267, doi:10.1038/365264a0 (1993).
- 14 Restifo, N. P. *et al.* Antigen processing in vivo and the elicitation of primary CTL responses. *J Immunol* **154**, 4414-4422 (1995).
- 15 Bignell, G. R. *et al.* Signatures of mutation and selection in the cancer genome. *Nature* **463**, 893-898, doi:10.1038/nature08768 (2010).
- 16 Byrne-Hoffman, C. & Klinke, D. J. A quantitative systems pharmacology perspective on cancer immunology. *Processes* **3**, 235-256 (2015).
- 17 Heidel, F. H., Arriba-Tutusaus, P., Armstrong, S. A. & Fischer, T. Evolutionarily conserved signaling pathways: acting in the shadows of acute myelogenous leukemia's genetic diversity. *Clin Cancer Res* **21**, 240-248, doi:10.1158/1078-0432.CCR-14-1436 (2015).
- 18 Kvitck, D. J. & Sherlock, G. Whole genome, whole population sequencing reveals that loss of signaling networks is the major adaptive strategy in a constant environment. *PLoS Genet* **9**, e1003972, doi:10.1371/journal.pgen.1003972 (2013).

- 19 Kulkarni, Y. M. *et al.* A quantitative systems approach to identify paracrine mechanisms that locally suppress immune response to Interleukin-12 in the B16 melanoma model. *Integr Biol (Camb)* **4**, 925-936, doi:10.1039/c2ib20053h (2012).
- 20 Carvajal, R. D. *et al.* KIT as a therapeutic target in metastatic melanoma. *JAMA* **305**, 2327-2334, doi:10.1001/jama.2011.746 (2011).
- 21 Hodi, F. S. *et al.* Imatinib for melanomas harboring mutationally activated or amplified KIT arising on mucosal, acral, and chronically sun-damaged skin. *J Clin Oncol* **31**, 3182-3190, doi:10.1200/JCO.2012.47.7836 (2013).
- 22 Schulz, O. *et al.* CD40 triggering of heterodimeric IL-12 p70 production by dendritic cells in vivo requires a microbial priming signal. *Immunity* **13**, 453-462 (2000).
- 23 Davies, M. A. The role of the PI3K-AKT pathway in melanoma. *Cancer J* **18**, 142-147, doi:10.1097/PPO.0b013e31824d448c (2012).
- 24 Collison, L. W. *et al.* The composition and signaling of the IL-35 receptor are unconventional. *Nat Immunol* **13**, 290-299, doi:10.1038/ni.2227 (2012).
- 25 Fuhrer, D. K. & Yang, Y. C. Complex formation of JAK2 with PP2A, P13K, and Yes in response to the hematopoietic cytokine interleukin-11. *Biochem Biophys Res Commun* **224**, 289-296 (1996).
- 26 Yamada, O., Ozaki, K., Akiyama, M. & Kawauchi, K. JAK-STAT and JAK-PI3K-mTORC1 pathways regulate telomerase transcriptionally and posttranslationally in ATL cells. *Mol Cancer Ther* **11**, 1112-1121, doi:10.1158/1535-7163.MCT-11-0850 (2012).
- 27 Pawson, T. & Warner, N. Oncogenic re-wiring of cellular signaling pathways. *Oncogene* **26**, 1268-1275, doi:10.1038/sj.onc.1210255 (2007).
- 28 Creixell, P. *et al.* Kinome-wide decoding of network-attacking mutations rewiring cancer signaling. *Cell* **163**, 202-217, doi:10.1016/j.cell.2015.08.056 (2015).
- 29 Yu, J. *et al.* Noncanonical NF-kappaB activation mediates STAT3-stimulated IDO upregulation in myeloid-derived suppressor cells in breast cancer. *J Immunol* **193**, 2574-2586, doi:10.4049/jimmunol.1400833 (2014).
- 30 Klinke, D. J., 2nd. Signal transduction networks in cancer: quantitative parameters influence network topology. *Cancer Res* **70**, 1773-1782, doi:10.1158/0008-5472.CAN-09-3234 (2010).
- 31 Lee, M. J. *et al.* Sequential application of anticancer drugs enhances cell death by rewiring apoptotic signaling networks. *Cell* **149**, 780-794, doi:10.1016/j.cell.2012.03.031 (2012).
- 32 Yue, F. Y. *et al.* IL-12 directly up-regulates the expression of HLA class I, HLA class II and ICAM-1 on human melanoma cells: a mechanism for its antitumor activity? *Eur J Immunol* **29**, 1762-1773, doi:10.1002/(SICI)1521-4141(199906)29:06<1762::AID-IMMU1762>3.0.CO;2-F (1999).
- 33 Su, W. *et al.* The direct effect of IL-12 on tumor cells: IL-12 acts directly on tumor cells to activate NF-kappaB and enhance IFN-gamma-mediated STAT1 phosphorylation. *Biochem Biophys Res Commun* **280**, 503-512, doi:10.1006/bbrc.2000.4150 (2001).
- 34 Schwarz, H., Schmittner, M., Duschl, A. & Horejs-Hoek, J. Residual endotoxin contaminations in recombinant proteins are sufficient to activate human CD1c+ dendritic cells. *PLoS One* **9**, e113840, doi:10.1371/journal.pone.0113840 (2014).
- 35 Airolidi, I. *et al.* Endogenous IL-12 triggers an antiangiogenic program in melanoma cells. *Proc Natl Acad Sci U S A* **104**, 3996-4001, doi:10.1073/pnas.0609028104 (2007).
- 36 Krock, B. L., Skuli, N. & Simon, M. C. Hypoxia-induced angiogenesis: good and evil. *Genes Cancer* **2**, 1117-1133, doi:10.1177/1947601911423654 (2011).
- 37 Gorelik, E. *et al.* IL-12 receptor-mediated upregulation of FasL in human ovarian carcinoma cells. *Int J Cancer* **112**, 620-627, doi:10.1002/ijc.20482 (2004).

- 38 Kershaw, NJ. et al. SOCS3 binds specific receptor-JAK complexes to control cytokine signaling by direct kinase inhibition. *Nat Struct Mol Biol* 20, 469-76, doi:10.1038/nsmb.2519 (2013).

## **TABLES**

**Table 1.** IL-12 pathway genes are upregulated in human melanoma. Comparison of IL12RB1 and IL12RB2 expression in normal, nevus, and melanoma human tissue samples provided from the Oncomine database (Talantov) shows a 2.26-fold and 5-fold difference in IL12RB1 and IL12RB2 expression, respectively, between normal and melanoma cells. Similarly, the data obtained from the TCGA database shows almost a 1.6-fold difference between metastatic and primary tumor IL12RB2 gene expression. Ratios of IL12RB2 to IL12RB1 gene expression in human melanoma cell lines were calculated from TCGA, Oncomine, and Cancer Cell Line Encyclopedia. Ratios were normally distributed with a mean of 0.76, 2.41, and 3.71 ( $p < 0.0001$ ) for normal, nevus, and melanoma samples in Oncomine, respectively; 28.5 for metastatic tumors and 36.24 in primary tumors for TCGA samples, 1.055 and ( $p < 0.05$ , ratio  $> 1$ ) for homogeneous melanoma samples in CCLE. Note: Samples were not available on TCGA platform for statistical comparison of primary and metastatic tumors to normal.

|                                                 | <b>Gene</b>     | <b>Comparison</b>     | <b>Fold Change/Ratio</b> |
|-------------------------------------------------|-----------------|-----------------------|--------------------------|
| <b>Oncomine Talantov</b><br><b>(70 samples)</b> | IL12RB1         | Melanoma Vs Normal    | 2.26**                   |
|                                                 |                 | Nevus Vs Normal       | 1.74                     |
|                                                 | IL12RB2         | Melanoma Vs Normal    | 5.00†                    |
|                                                 |                 | Nevus Vs Normal       | 1.58                     |
|                                                 | IL12RB2:IL12RB1 | Normal                | 0.76                     |
|                                                 |                 | Nevus                 | 2.41                     |
|                                                 |                 | Melanoma              | 3.17†                    |
| <b>TCGA</b><br><b>(478 samples)</b>             | IL12RB1         | Metastatic Vs Primary | 1.58**                   |
|                                                 | IL12RB2         | Metastatic Vs Primary | 1.02                     |
|                                                 | IL12RB2:IL12RB1 | Metastatic            | 26.42                    |
|                                                 |                 | Primary               | 36.24                    |
| <b>CCLE</b><br><b>(61 samples)</b>              | IL12RB2:IL12RB1 | Melanoma              | 1.055*                   |

\*p<0.05

\*\*p<0.01

\*\*\*p<0.001

†p<0.0001

## FIGURE CAPTIONS

**Figure 1. Components of the IL-12 receptor are differentially expressed in mouse melanoma cell lines compared to T cells.** IL12RB1 (left panels) and IL12RB2 (right panels) expression in B16F0 melanoma (a), Cloudman S91 (b), Melan-A “normal” melanocytes (c), and 2D6 Th1 T helper cells (d), were assayed by flow cytometry. Antibody-binding calibration beads were used to determine copy numbers. No stain samples were used as negative controls (gray shaded curves). Results representative of at least three biological replicates.

**Figure 2. B16F0 melanoma cells but not Melan-A melanocytes can be rescued from the cytotoxic effect of imatinib by IL-12.** Cell viability in response to different concentrations of IL-12 and imatinib was assayed by flow cytometry, whereby representative results for specific concentrations (a: No IL-12, No imatinib; b: 20  $\mu$ M imatinib; c: 200 ng/mL IL-12 and 20  $\mu$ M imatinib) are shown. Cell events were identified based on forward and side scatter properties (enclosed in red curve in left panel). Annexin V and PI staining were used to identify viable cells (PI negative, Annexin V negative), cells undergoing apoptotic (Annexin V positive, PI negative) and necrotic (Annexin V negative, PI positive) cell death, and cells in late stages of apoptosis (Annexin V positive, PI positive). (d) Using the collective observed data (symbols), a mathematical model was used to estimate the increase in EC50 of imatinib in the presence of IL-12. The curves trace the corresponding maximum likelihood predictions for each experimental condition. A Markov Chain Monte Carlo approach was used to estimate the model parameters. The posterior distributions in the EC50 of imatinib and the rescue effect of IL-12 ( $\alpha$ ) are shown in the bottom panels. (e) Viability of B16F0 cells (top panel) and Melan-A cells (middle panel) were assayed following exposure to the indicated concentrations of imatinib in the presence (red curves) or absence (black curves) of 200 ng/mL IL-12. The resulting data (symbols) were analyzed using a mathematical model, where the maximum likelihood predictions for each experimental condition are indicated by the curves. The posterior



distributions in the rescue effect of IL-12 ( $\alpha$ ) are shown in the bottom panels (Melan-A: grey shaded, B16F0: black curve).

**Figure 3. IL12RB2 knockdown in B16F0 decreases the survival benefit of IL-12.** (a) Flow cytometry was used to compare IL12RB2 expression in B16F0 cells edited using a CRISPR/Cas9 construct to knockdown IL12RB2 (IL12RB2 KD – black histogram) with wild-type (wt – red histogram) B16F0 cells. Unstained B16F0 cells were used as a negative control (grey shaded histogram). Cell viability was assessed using an ATPlite assay in wild-type (b) and IL12RB2 KD (c) B16F0 cells following treatment with the indicated concentration of imatinib with or without pre-treatment with 100 ng/ml of IL-12. Results are summarized by a bar graph (ave +/- stdev) overlaid with individual results (x's) that represent at least 5 independent biological replicates for each condition. Statistical significance in the difference in viability upon IL-12 treatment for a given imatinib concentration was assessed using a two-tailed homoscedastic t-Test, where \*\* indicates a p-value < 0.005 and \* indicates a p-value < 0.05.

**Figure 4. B16F0 melanoma cells transduce non-canonical signals in response to IL-12 stimulation.** Live (top panel) B16F0 (A) and 2D6 (B) cells were stimulated with 100 ng/mL IL-12 and assayed for STAT4 (middle panel) and Akt (bottom panel) phosphorylation by flow cytometry. IL-12 stimulated cells (blue curves) were compared with unstimulated (black curves), no stain (gray shaded curves) and positive controls (red curves). For 2D6 cells, a positive control was obtained following a culture without IL-12 for 12 hours, followed by stimulation with 40 ng/mL IL-12 for 3 hours. For B16F0 cells, a positive control was obtained following culture without serum for 12 hours, followed by stimulation with media containing 10% FBS. Panels C and D summarize the observed response across all of the experimental groups and replicates.

**Figure 5. IL-12 phosphorylated Akt on serine 472/473 (Ser472/473) but not threonine 308**

**(Thr308) in B16F0 cells.** Activation of Akt by IL-12 (100 ng/mL) in B16F0 was probed using antibodies that recognized phosphorylation at serine 472/273 (A) and threonine 308 (B). IL-12-stimulated cells were compared against unstimulated (negative control), 10% FBS stimulated (positive control), and cells stimulated with IL-12 plus PI3K inhibitor LY294002 (IL12+LY), FBS plus PI3K inhibitor (LY294002), or IL-12 plus pAkt selective inhibitor (IL12+MK). Beta-actin and total Akt serve as loading controls. Results are representative of at least 3 replicates.

**Figure 6. Schematic diagram illustrating the different in canonical versus non-canonical response to IL-12.**

**(a)** The canonical IL-12 pathway is triggered by (1) ligand-mediated heterodimerization of the receptor subunits IL12RB1 and IL12RB2. (2) Formation of the receptor complex promotes the phosphorylation of receptor associated kinases JAK2 and TYK2 and of a signal transducer binding site on the cytoplasmic tail of IL12RB2. (3) Phosphorylation of this IL12RB2 binding site attracts STAT4 that is subsequently phosphorylated by JAK2. (4) Phosphorylated STAT4 dimerizes and translocates into the nucleus to initiate STAT4-mediated transcription that promotes cell proliferation and Interferon-gamma production. **(b)** The non-canonical IL-12 pathway is triggered by (1) IL-12-mediated homodimerization of IL12RB2 subunits. (2) Homodimerization of IL12RB2 activates the JAK2 receptor associated kinases, which in turn (3) recruit and activate PI3K via the p85a subunit. (4) Activated PI3K then phosphorylates Thr308-primed Akt at the Ser 472/473 loci, which engages the canonical Akt response that includes enhanced survival.

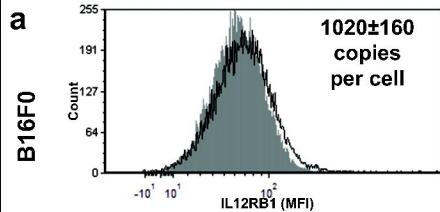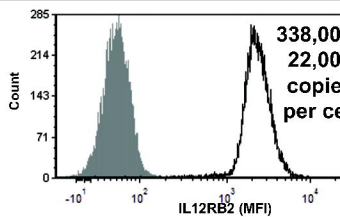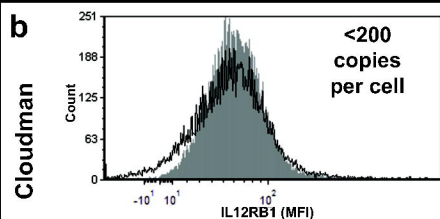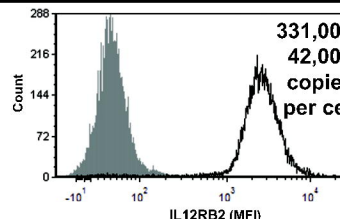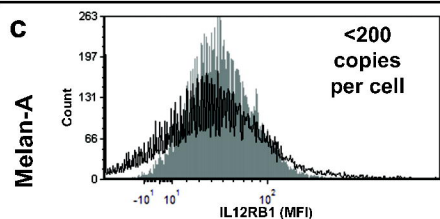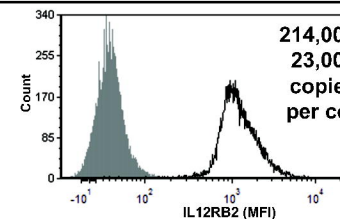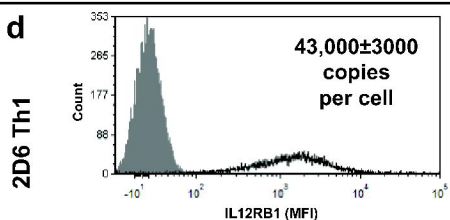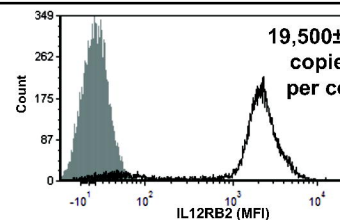

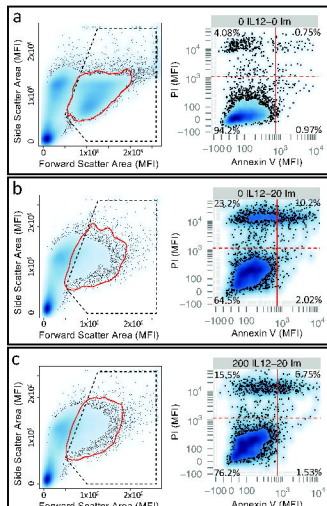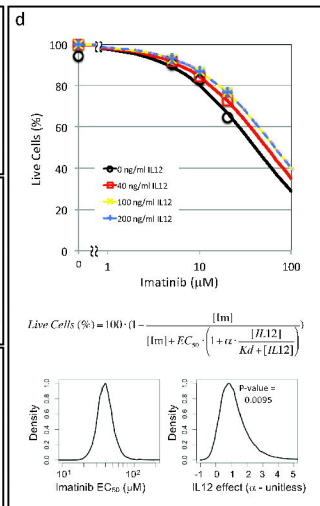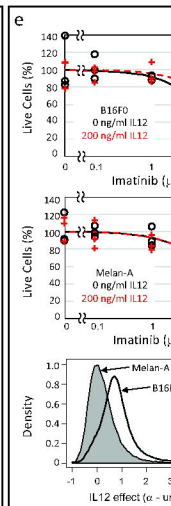

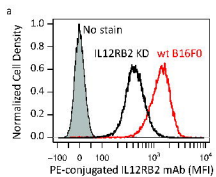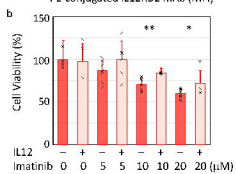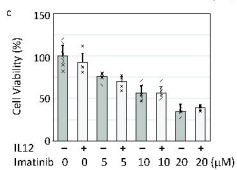

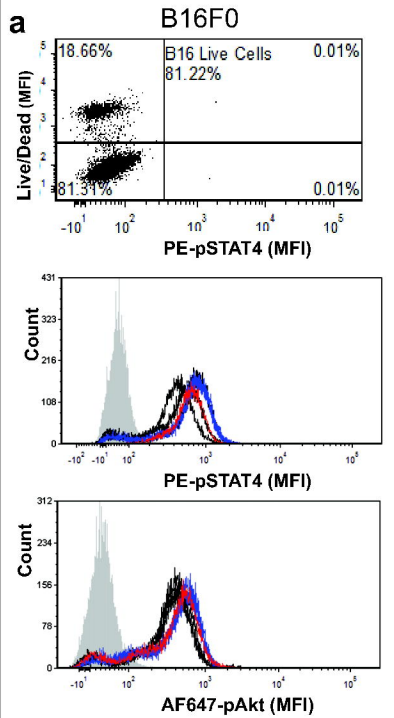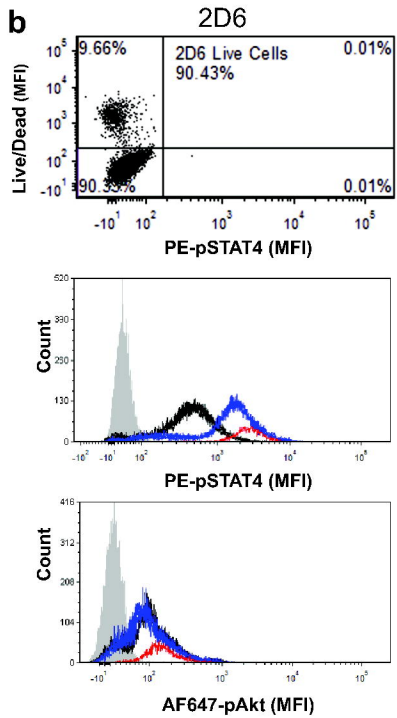

■ No Stain ■ No Stim ■ 100 ng/mL IL-12p70 ■ Positive Control

**a**

No Stim      FBS      IL-12      *IL12+LY*      *FBS+LY*      *IL12+MK*

pAkt  
(S472/473)

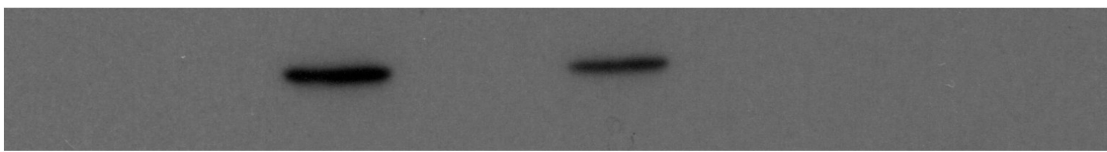

Total Akt

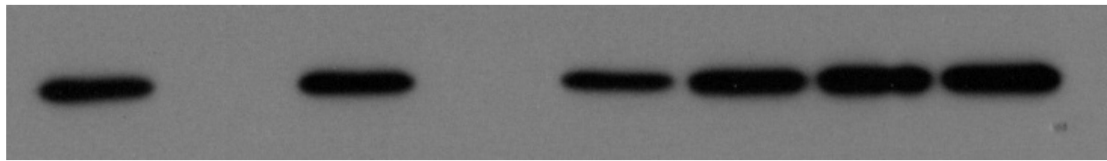

$\beta$ -actin

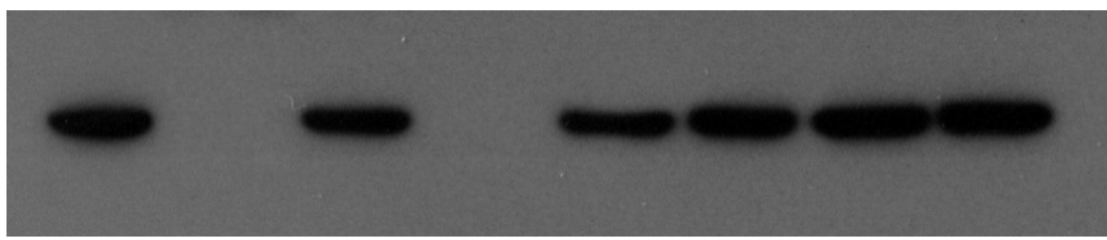

**b**

No Stim      FBS      IL-12      *IL12+LY*      *FBS+LY*      *IL12+MK*

pAkt  
(Thr308)

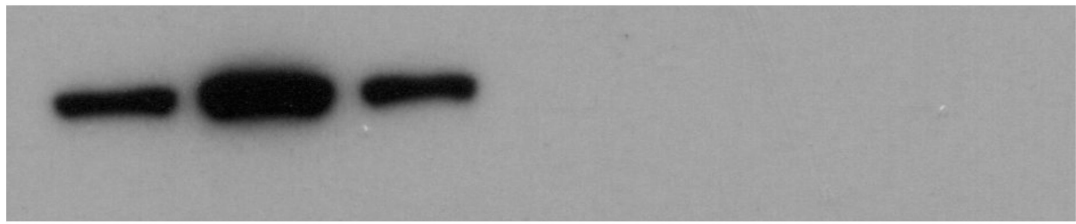

Total Akt

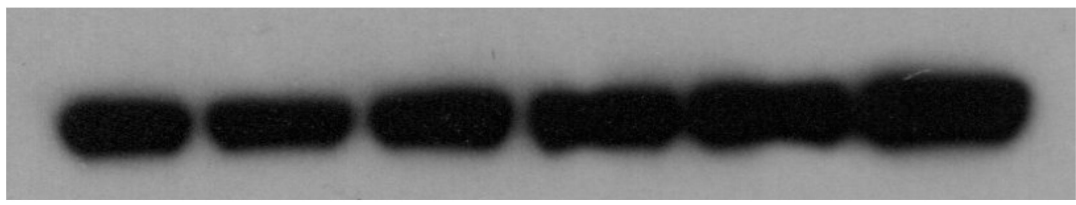

$\beta$ -actin

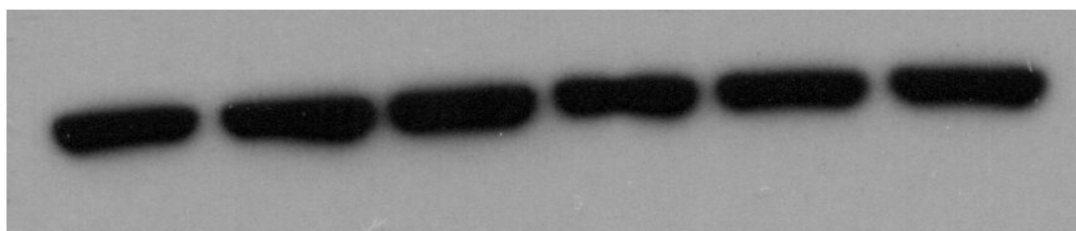

## a. Canonical response to IL12

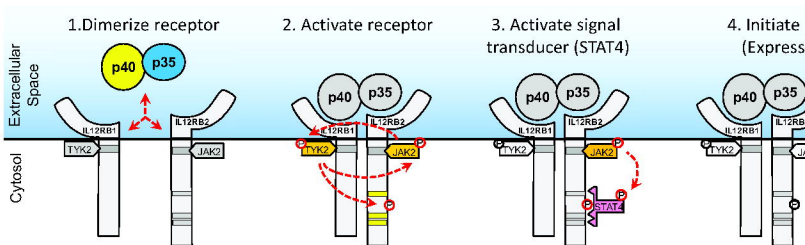

## b. Non-canonical response to IL12

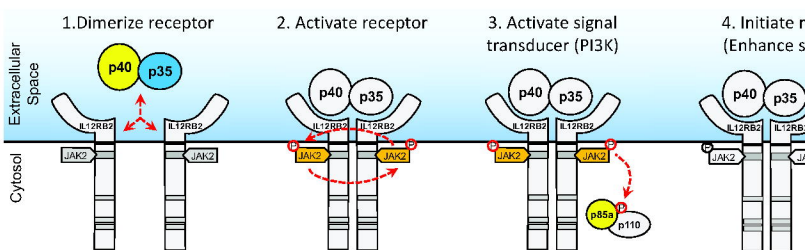

Source: http://biorxiv.org/content/10.1101/608828v1.full.pdf
